# Supplementary material for: Performance Enhancement of Trimetallic Nanoparticles in Photocatalysis through Chemical Etching
Source: Research Square preprint supplement (doi:10.21203/rs.3.rs-5819331/v1), 2025-01-15
Supplement: Supplementary file 1 [file 25650579283f62204781dd1b.docx]

**Performance Enhancement of Trimetallic Nanoparticles in Photocatalysis through Chemical Etching**

Yu-Chun Cheng1, Yun-Qi Dou1, Tian-Song Deng1,*

1*School of Electronics and Information Engineering, Hangzhou Dianzi University, Hangzhou 310018, P. R. China*

** Corresponding author. E-mail:* [*dengts@pku.edu.cn*](mailto:dengts@pku.edu.cn)


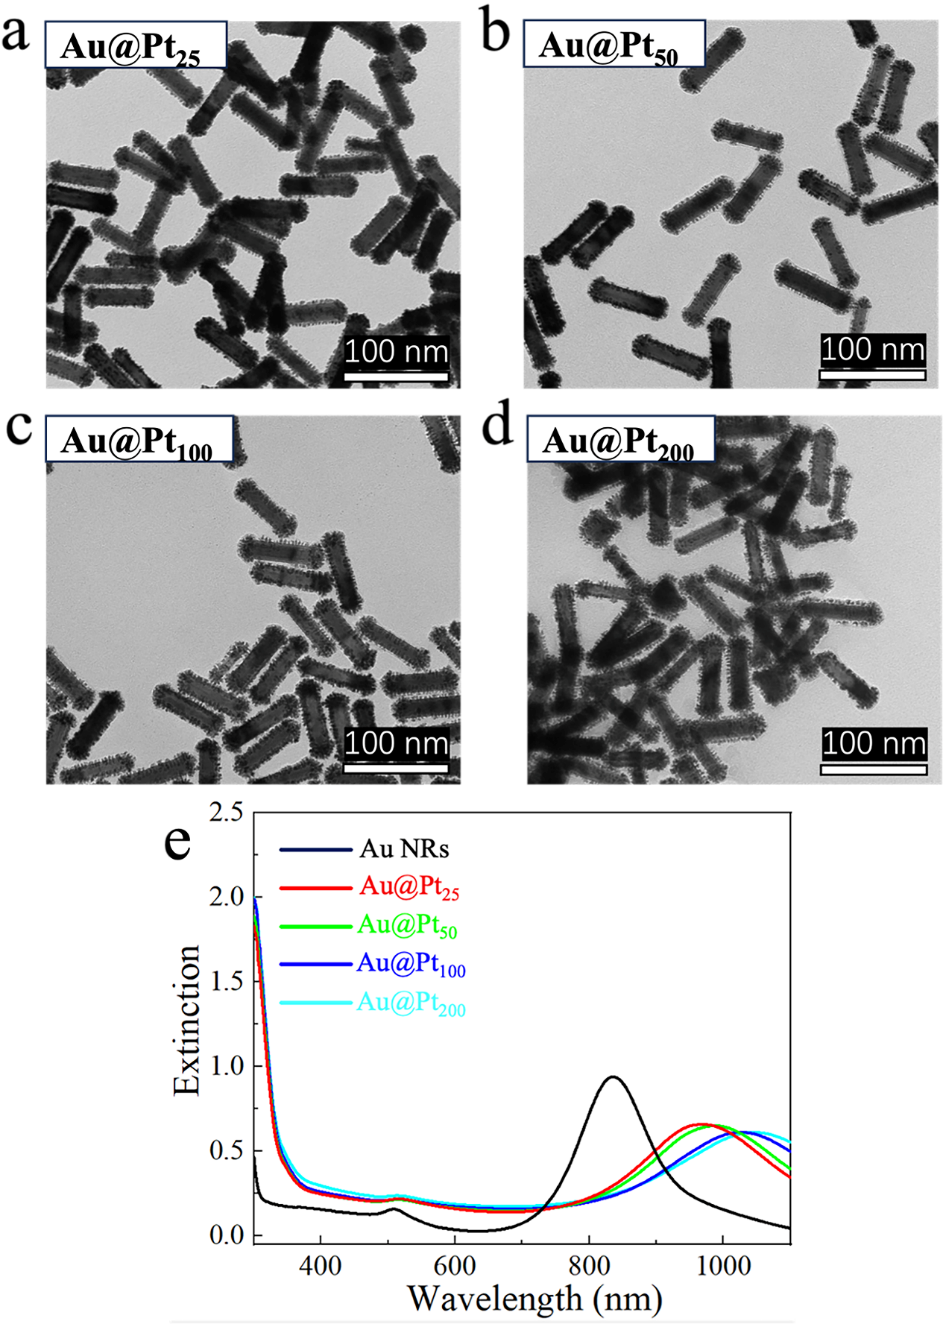


**Figure S1** The TEM images of Au@Pt synthesized by varying the amount of added K2PtCl4 solution. TEM images of (a) Au@Pt25, (b) Au@Pt50, (c) Au@Pt100, (d) Au@Pt200, where the corresponding scale in the bottom right corner is 100 nm, and (f) is their corresponding spectral diagrams.


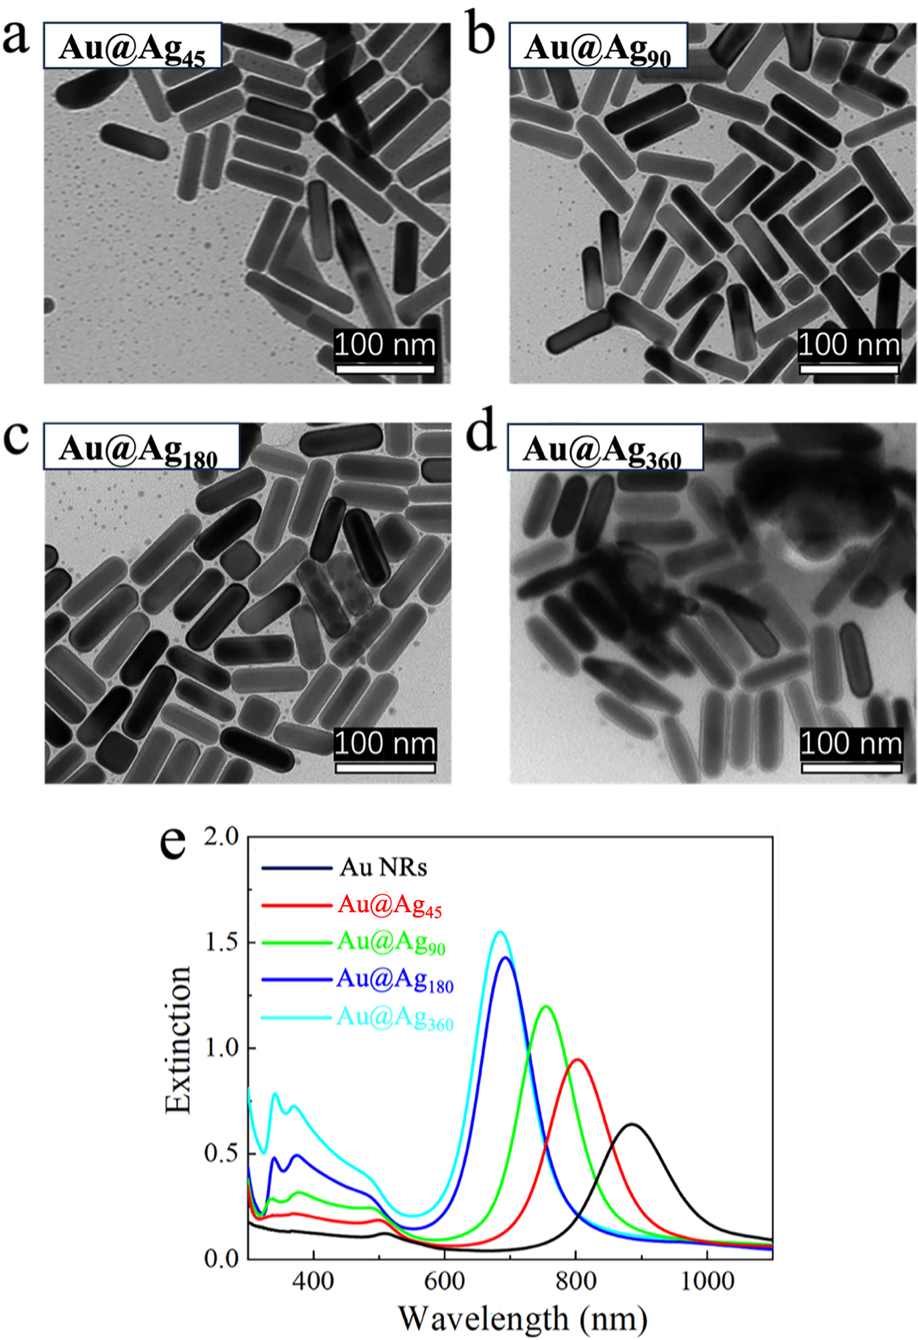


**Figure S2** The TEM images of Au@Ag synthesized by varying the amount of added AgNO3 solution. TEM images of (a) Au@Ag45, (b) Au@Ag90, (c) Au@Ag180, (d) Au@Ag360, where the corresponding scale in the bottom right corner is 100 nm, and (f) is their corresponding spectral diagrams.


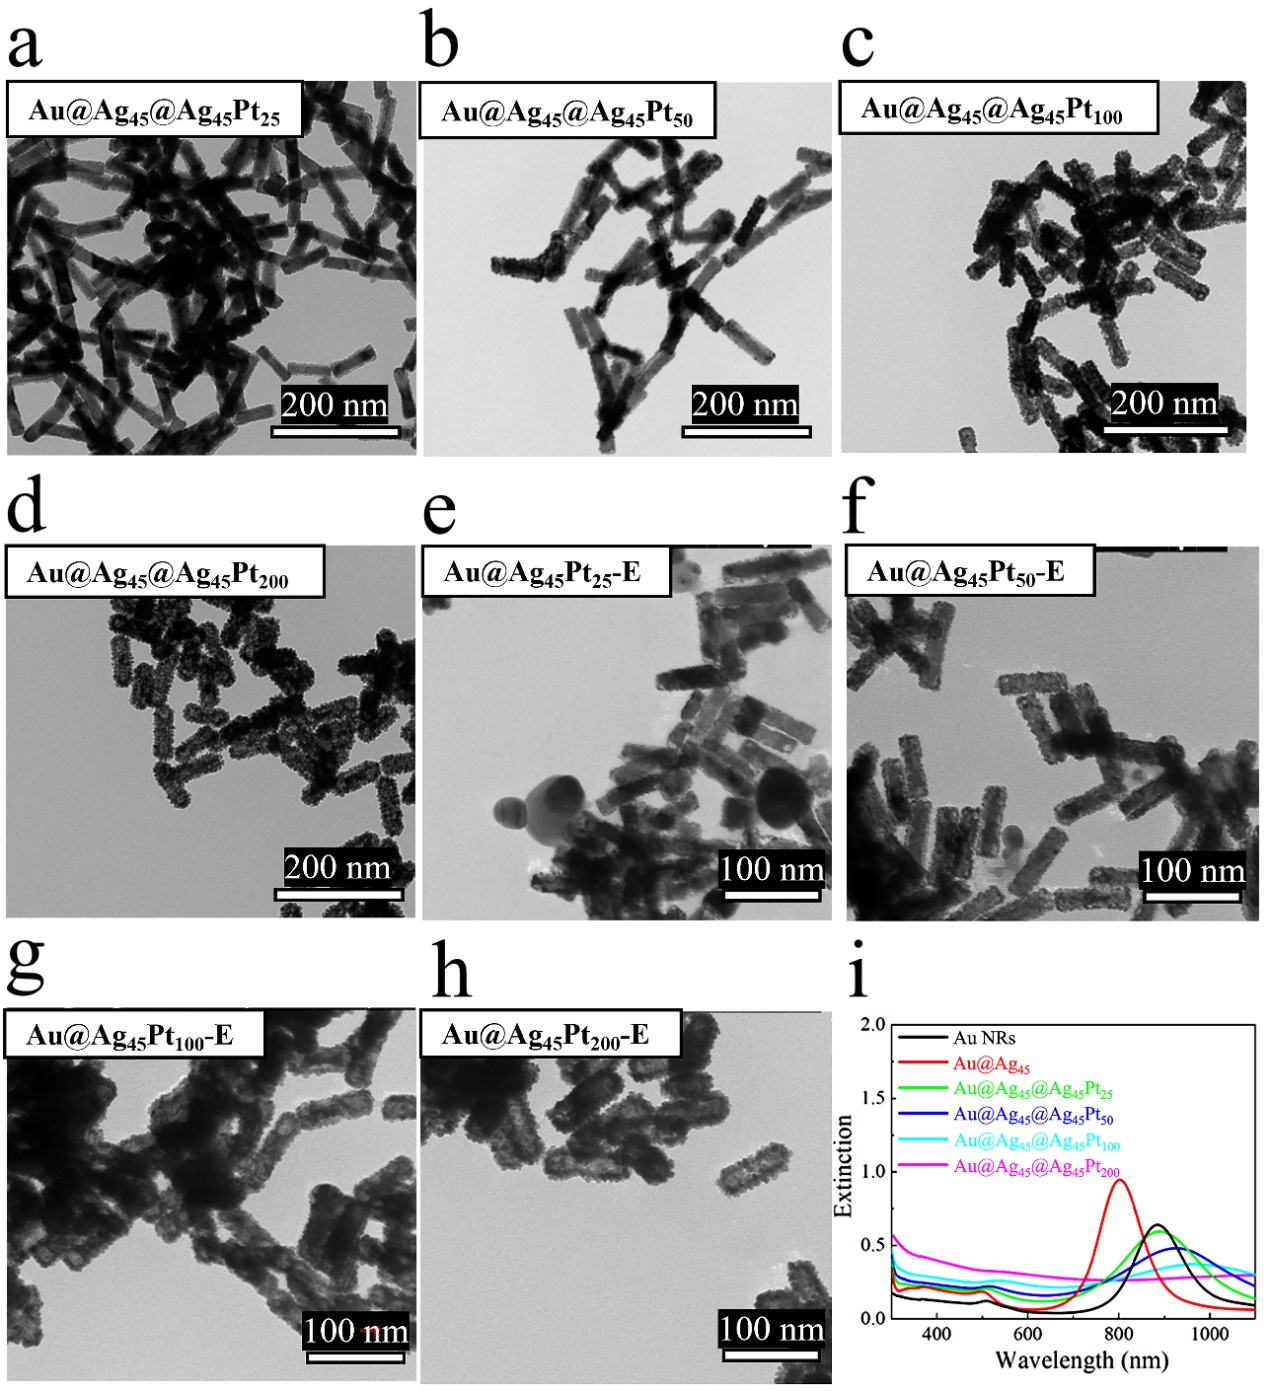
**Figure S3** The TEM images of Au@Ag@AgPt synthesized by keeping the amount of added AgNO3 solution constant at 0.01 mL while varying the amount of added K2PtCl4 solution, along with corresponding TEM images of the etched nanomaterials. TEM images of (a) Au@Ag45@Ag45Pt25, (b) Au@Ag45@Ag45Pt50, (c) Au@Ag45@Ag45Pt100, (d) Au@Ag45@Ag45Pt200, (e) Au@Ag45Pt25-E, (f) Au@Ag45Pt50-E, (g) Au@Ag45Pt100-E, (h) Au@Ag45Pt200-E, where the corresponding scale bars are located at the bottom right corner of the images, and (i) is the non-etched materials corresponding spectral diagrams.


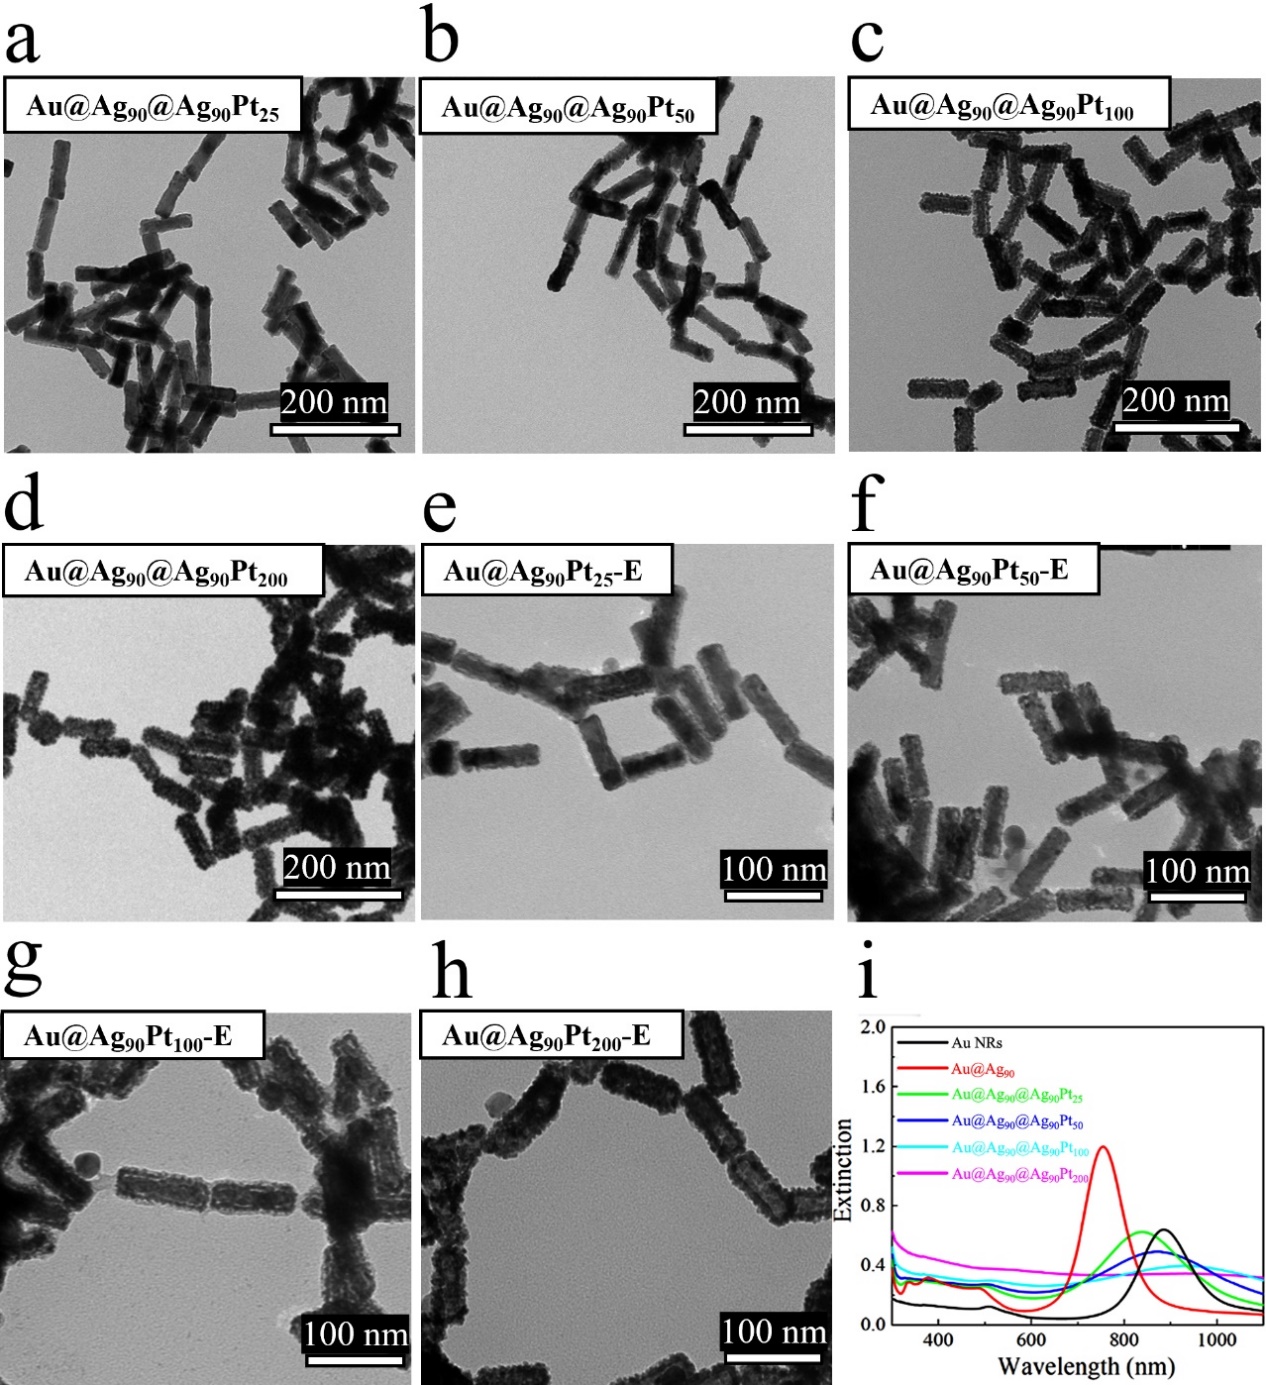
**Figure S4** The TEM images of Au@Ag@AgPt synthesized by keeping the amount of added AgNO3 solution constant at 0.02 mL while varying the amount of added K2PtCl4 solution, along with corresponding TEM images of the etched nanomaterials. TEM images of (a) Au@Ag90@Ag90Pt25, (b) Au@Ag90@Ag90Pt50, (c) Au@Ag90@Ag90Pt100, (d) Au@Ag90@Ag90Pt200, (e) Au@Ag90Pt25-E, (f) Au@Ag90Pt50-E, (g) Au@Ag90Pt100-E, (h) Au@Ag90Pt200-E, where the corresponding scale bars are located at the bottom right corner of the images, and (i) is the non-etched materials corresponding spectral diagrams.


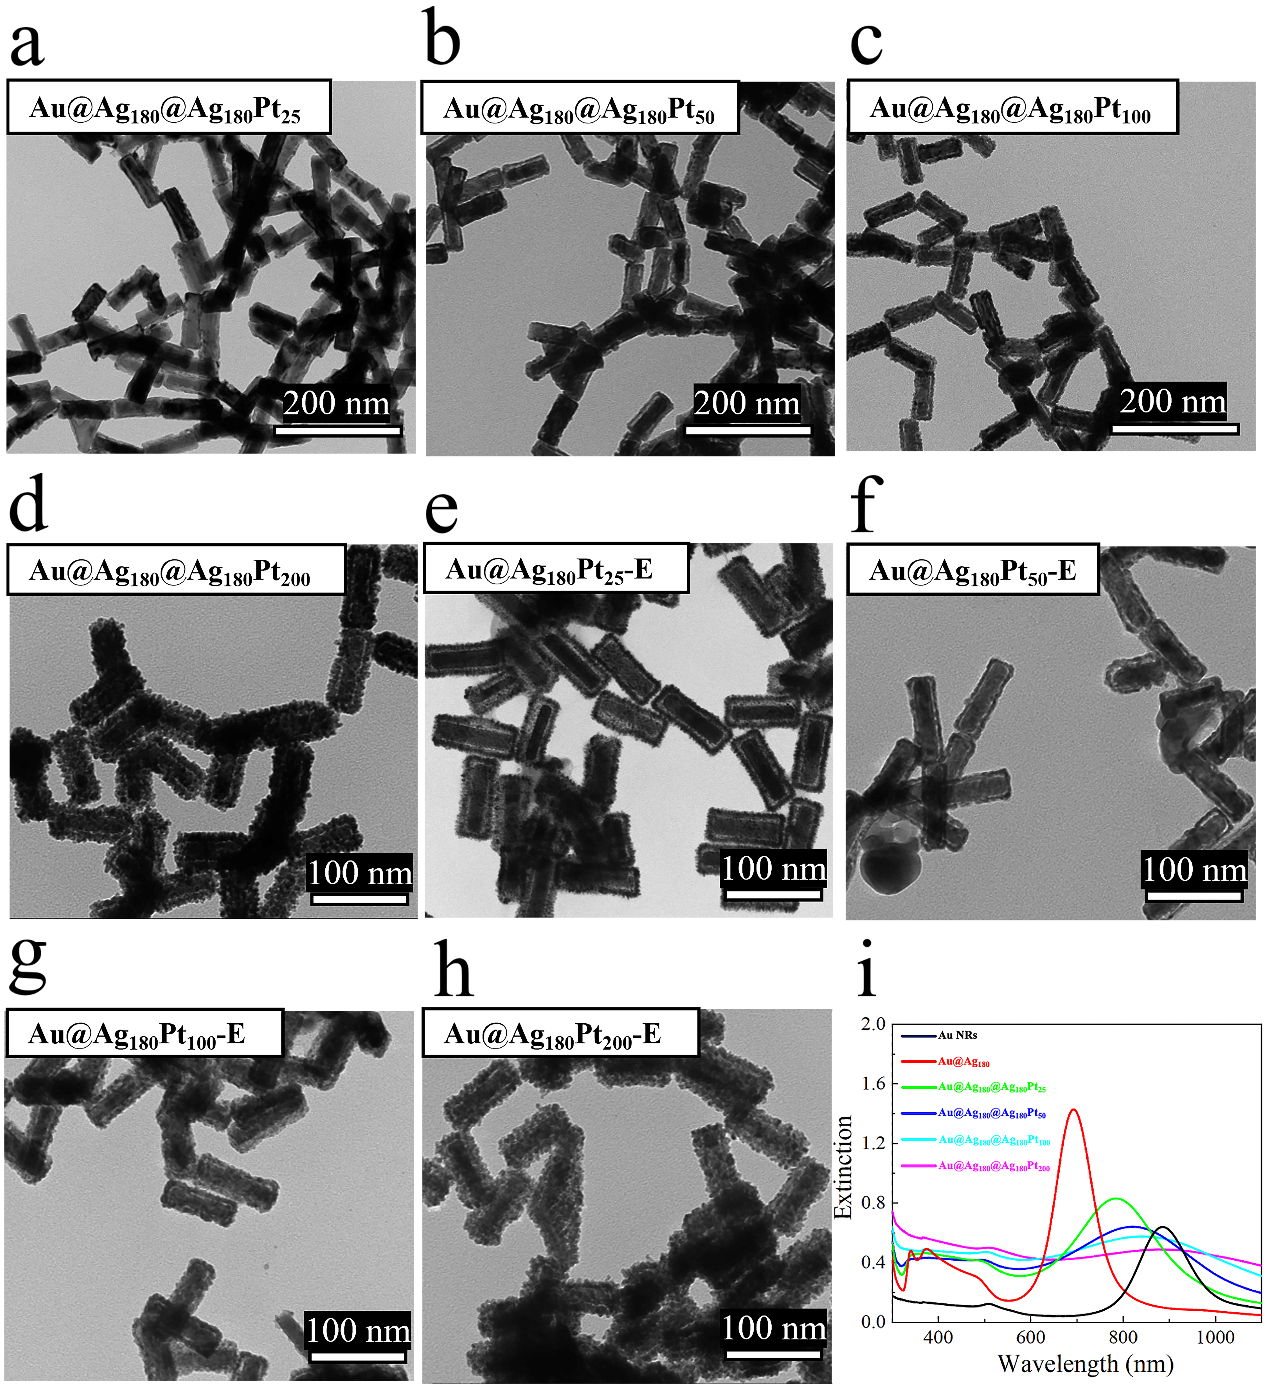


**Figure S5** The TEM images of Au@Ag@AgPt synthesized by keeping the amount of added AgNO3 solution constant at 0.04 mL while varying the amount of added K2PtCl4 solution, along with corresponding TEM images of the etched nanomaterials. TEM images of (a) Au@Ag180@Ag180Pt25, (b) Au@Ag180@Ag180Pt50, (c) Au@Ag180@Ag180Pt100, (d) Au@Ag180@Ag180Pt200, (e) Au@Ag180Pt25-E, (f) Au@Ag180Pt50-E, (g) Au@Ag180Pt100-E, (h) Au@Ag180Pt200-E, where the corresponding scale bars are located at the bottom right corner of the images, and (i) is the non-etched materials corresponding spectral diagrams.


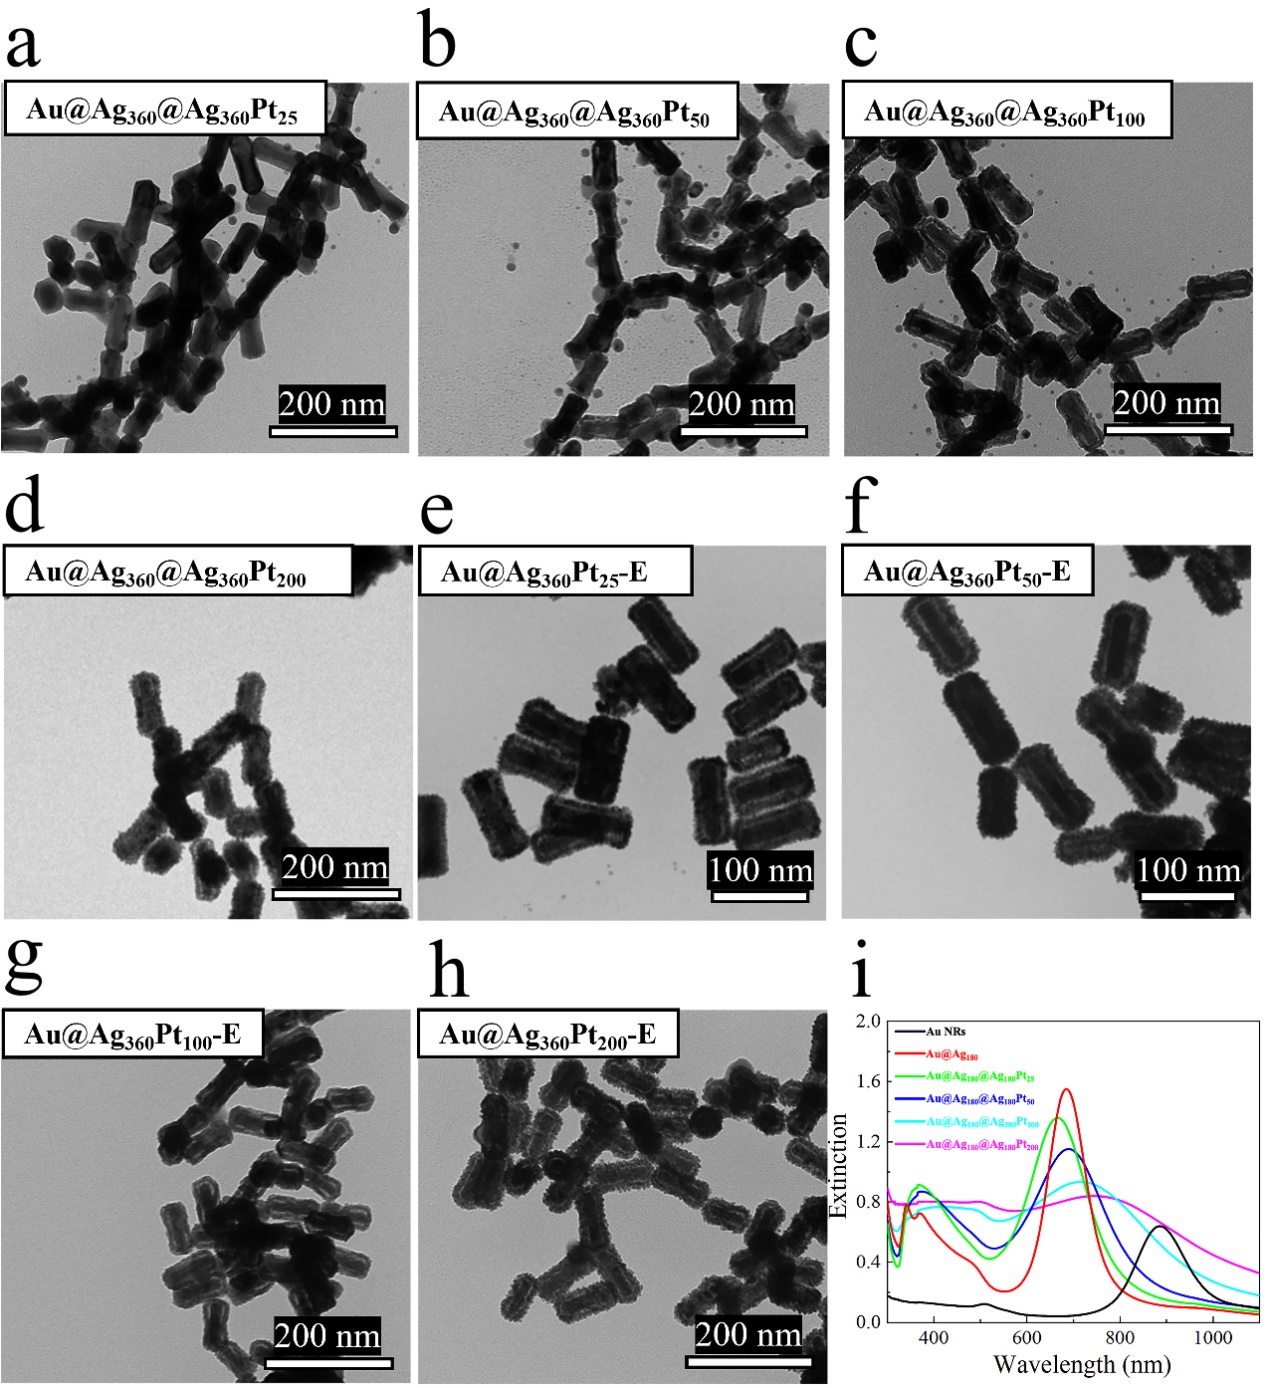
**Figure S6** The TEM images of Au@Ag@AgPt synthesized by keeping the amount of added AgNO3 solution constant at 0.08 mL while varying the amount of added K2PtCl4 solution, along with corresponding TEM images of the etched nanomaterials. (a) Au@Ag360@Ag360Pt25, (b) Au@Ag360@Ag360Pt50, (c) Au@Ag360@Ag360Pt100, (d) Au@Ag360@Ag360Pt200, (e) Au@Ag360Pt25-E, (f) Au@Ag360Pt50-E, (g) Au@Ag360Pt100-E, (h) Au@Ag360Pt200-E, where the corresponding scale bars are located at the bottom right corner of the images, and (i) is the non-etched materials corresponding spectral diagrams.


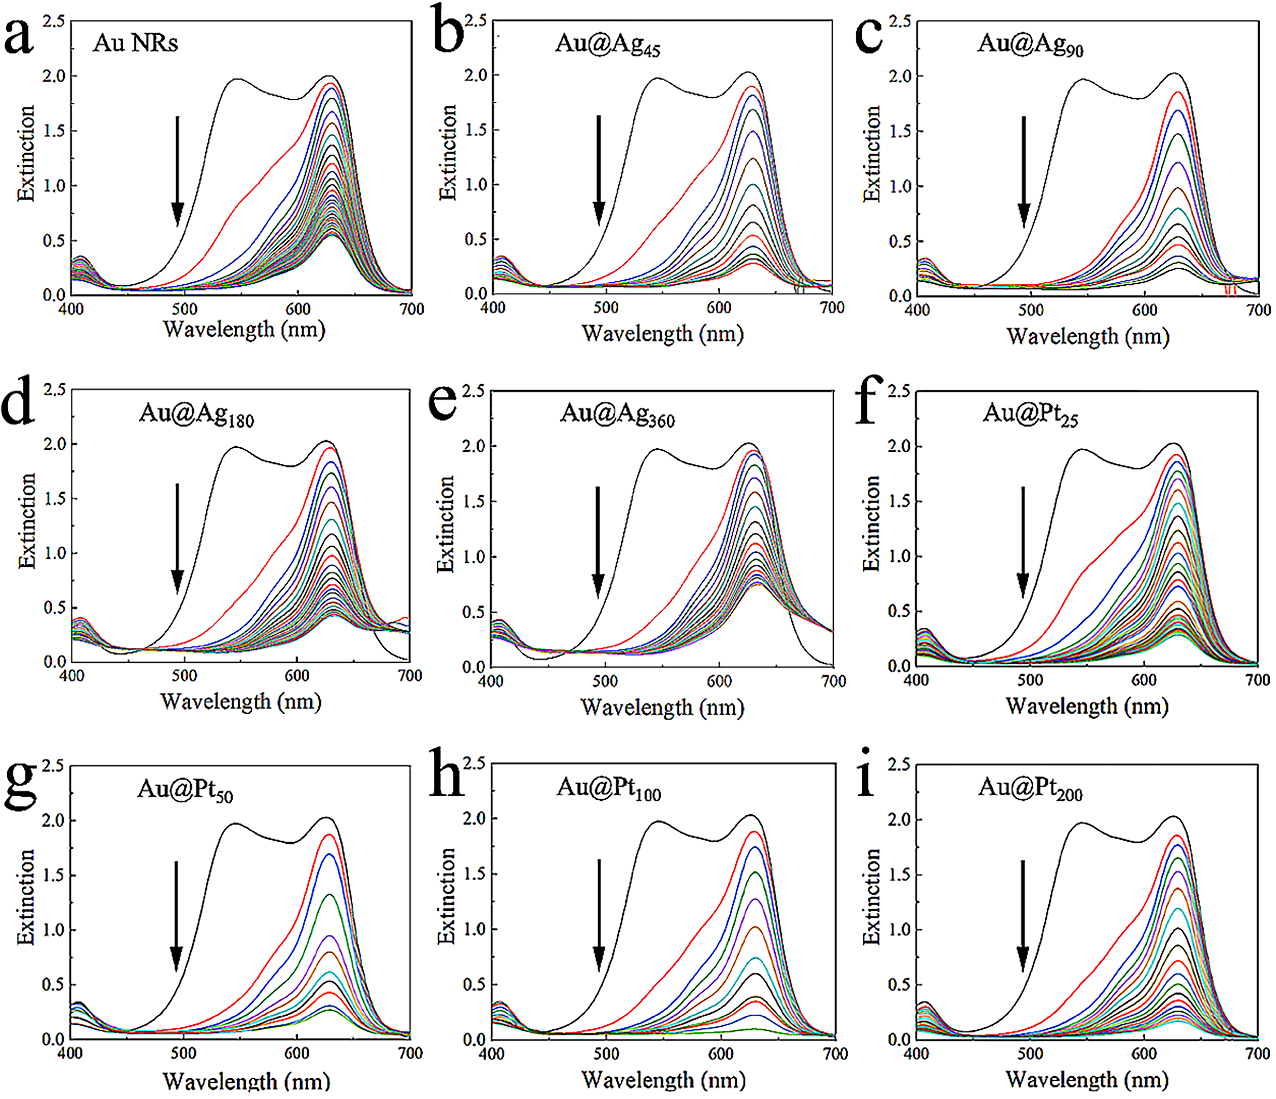
**Figure S7** The spectrum of Methylene Blue (MB) during the photocatalytic process of (a) Au NRs, (b) Au@Ag45, (c) Au@Ag90, (d) Au@Ag180, (e) Au@Ag360, (f) Au@Pt25, (g) Au@Pt50, (h) Au@Pt100, (i) Au@Pt200.


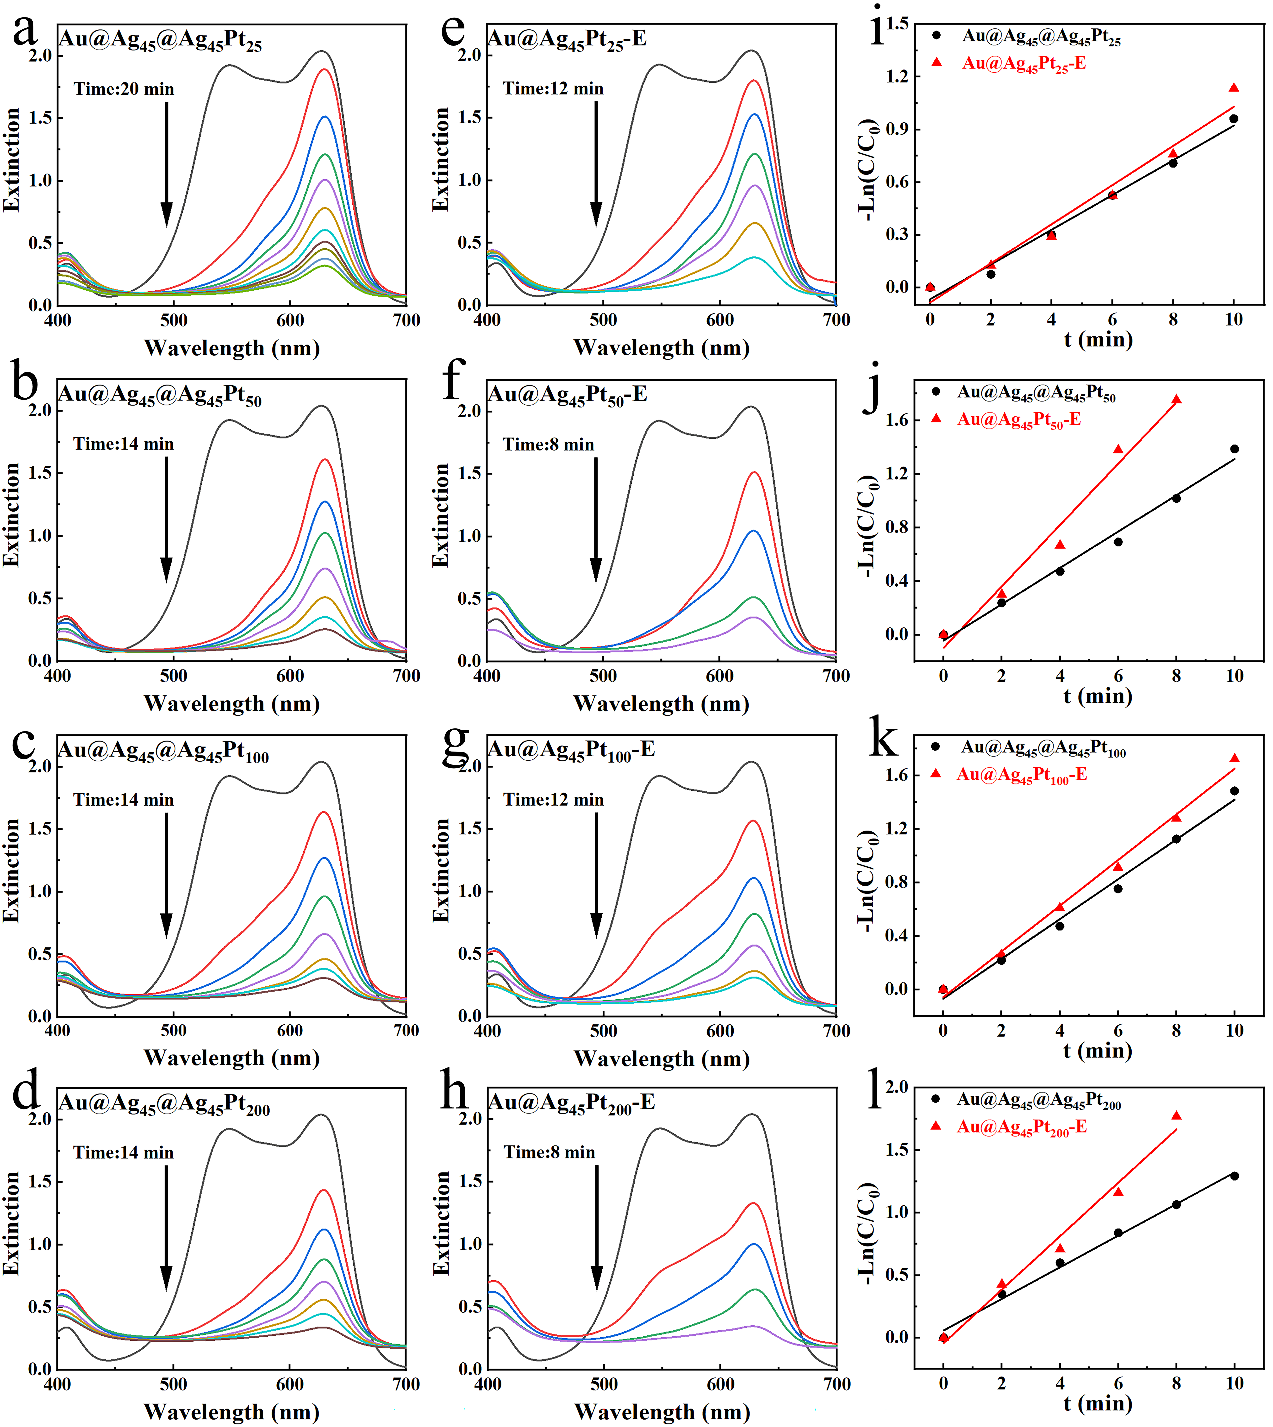
**Figure S8** The spectrum of Methylene Blue (MB) during the photocatalytic process of (a) Au@Ag45@Ag45Pt25, (b) Au@Ag45@Ag45Pt50, (c) Au@Ag45@Ag45Pt100, (d) Au@Ag45@Ag45Pt200, (e) Au@Ag45Pt25-E, (f) Au@Ag45Pt50-E, (g) Au@Ag45Pt100-E, (h) Au@Ag45Pt200-E. (i) – (l) The photocatalytic rate graphs of the corresponding materials before and after etching.


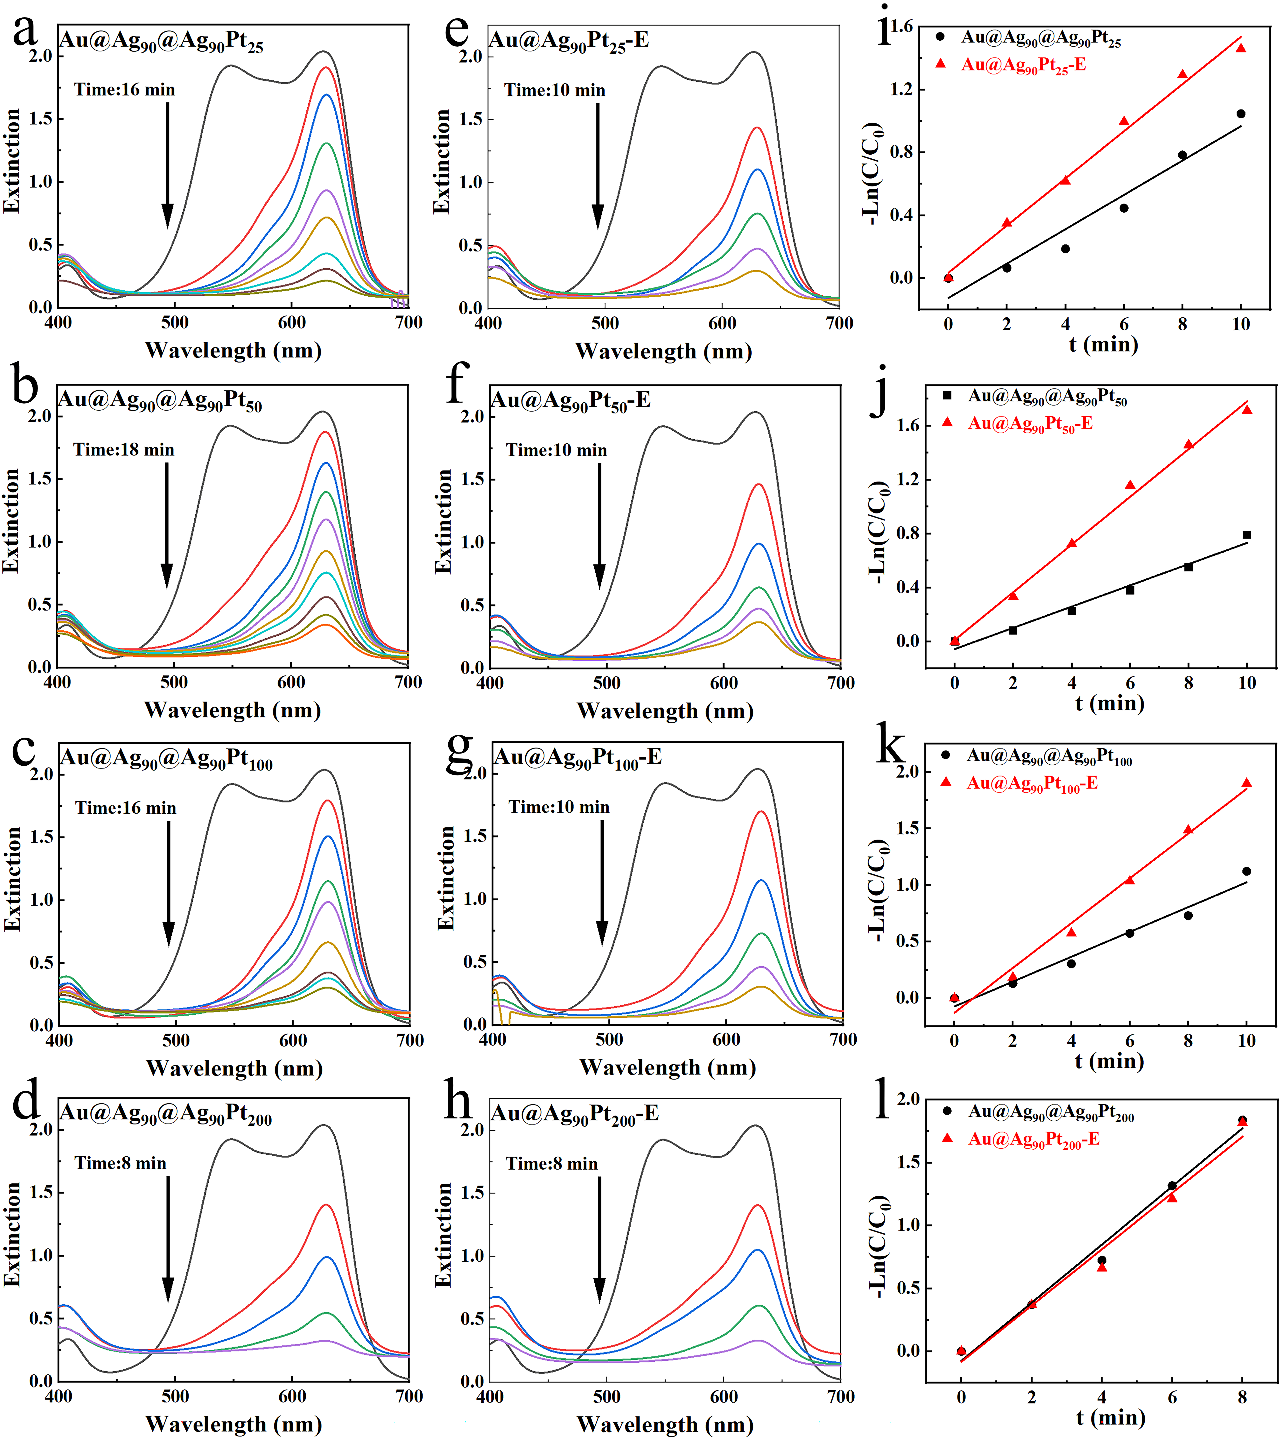


**Figure S9** The spectrum of Methylene Blue (MB) during the photocatalytic process of (a) Au@Ag90@Ag90Pt25, (b) Au@Ag90@Ag90Pt50, (c) Au@Ag90@Ag90Pt100, (d) Au@Ag90@Ag90Pt200, (e) Au@Ag90Pt25-E, (f) Au@Ag90Pt50-E, (g) Au@Ag90Pt100-E, (h) Au@Ag90Pt200-E. (i) – (l) The photocatalytic rate graphs of the corresponding materials before and after etching.


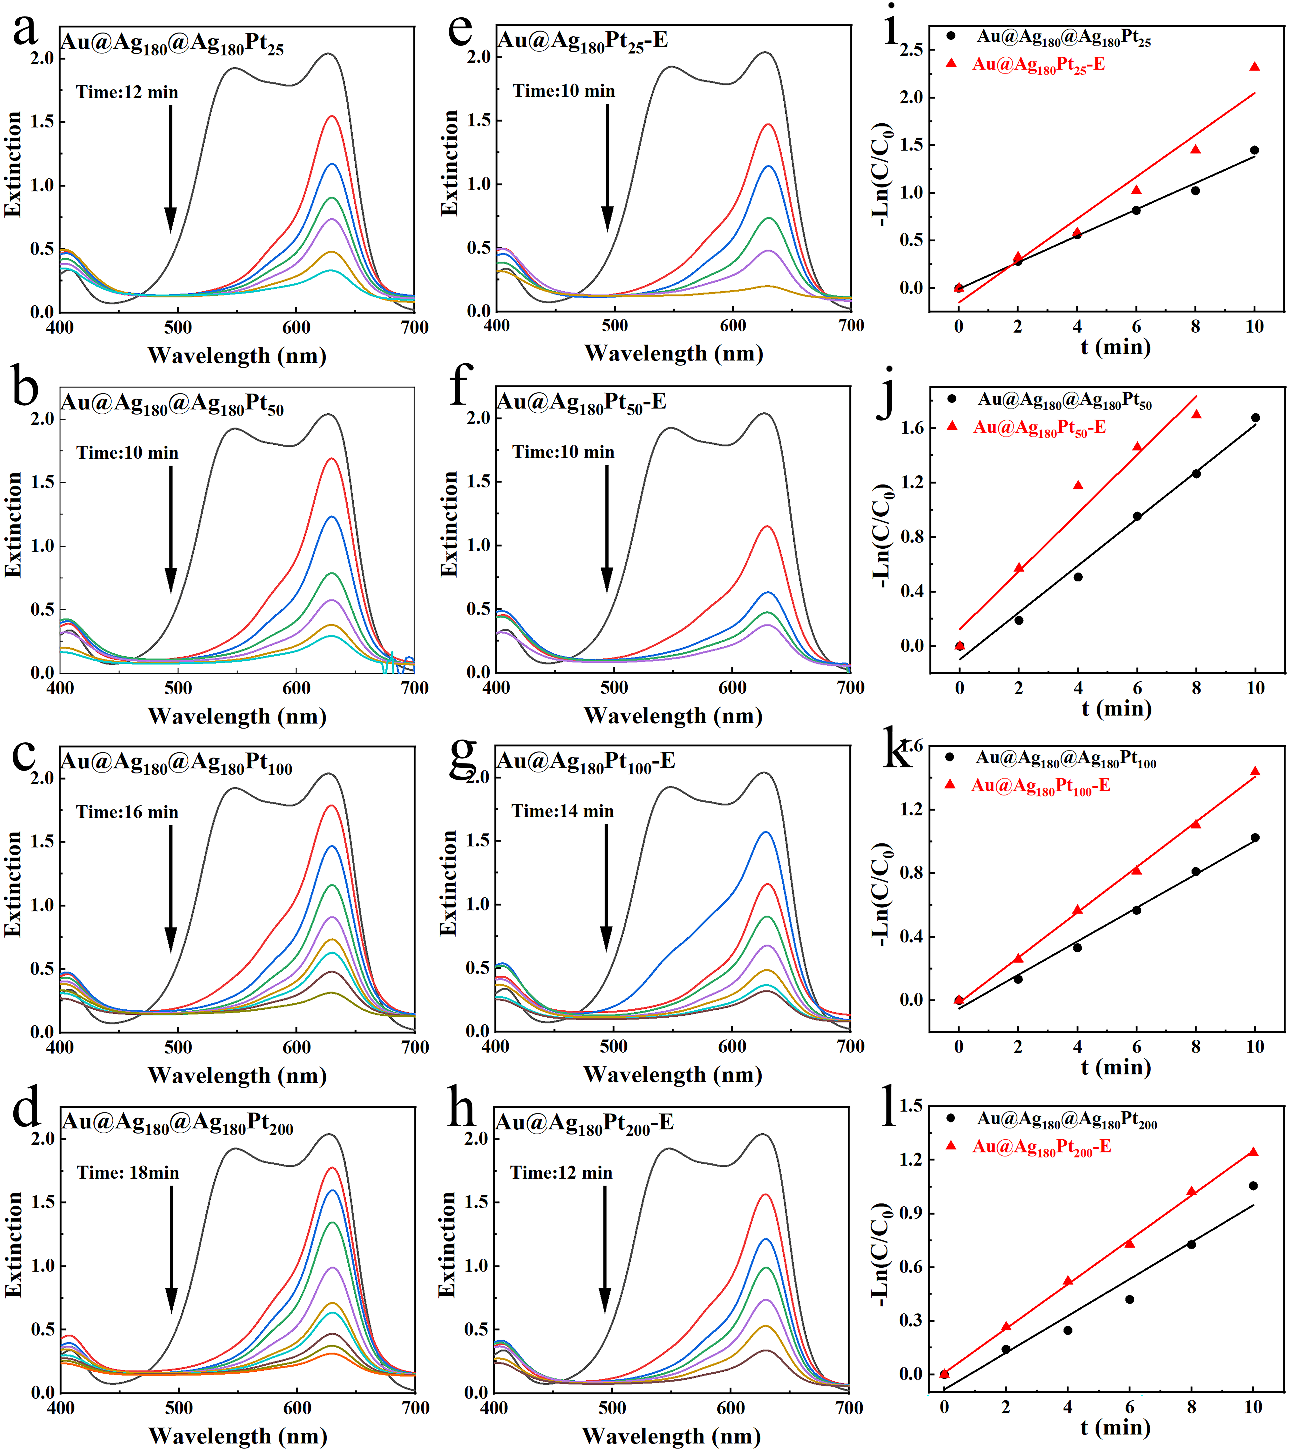


**Figure S10** The spectrum of Methylene Blue (MB) during the photocatalytic process of (a) Au@Ag180@Ag180Pt25, (b) Au@Ag180@Ag180Pt50, (c) Au@Ag180@Ag180Pt100, (d) Au@Ag180@Ag180Pt200, (e) Au@Ag180Pt25-E, (f) Au@Ag180Pt50-E, (g) Au@Ag180Pt100-E, (h) Au@Ag180Pt200-E. (i) – (l) The photocatalytic rate graphs of the corresponding materials before and after etching.


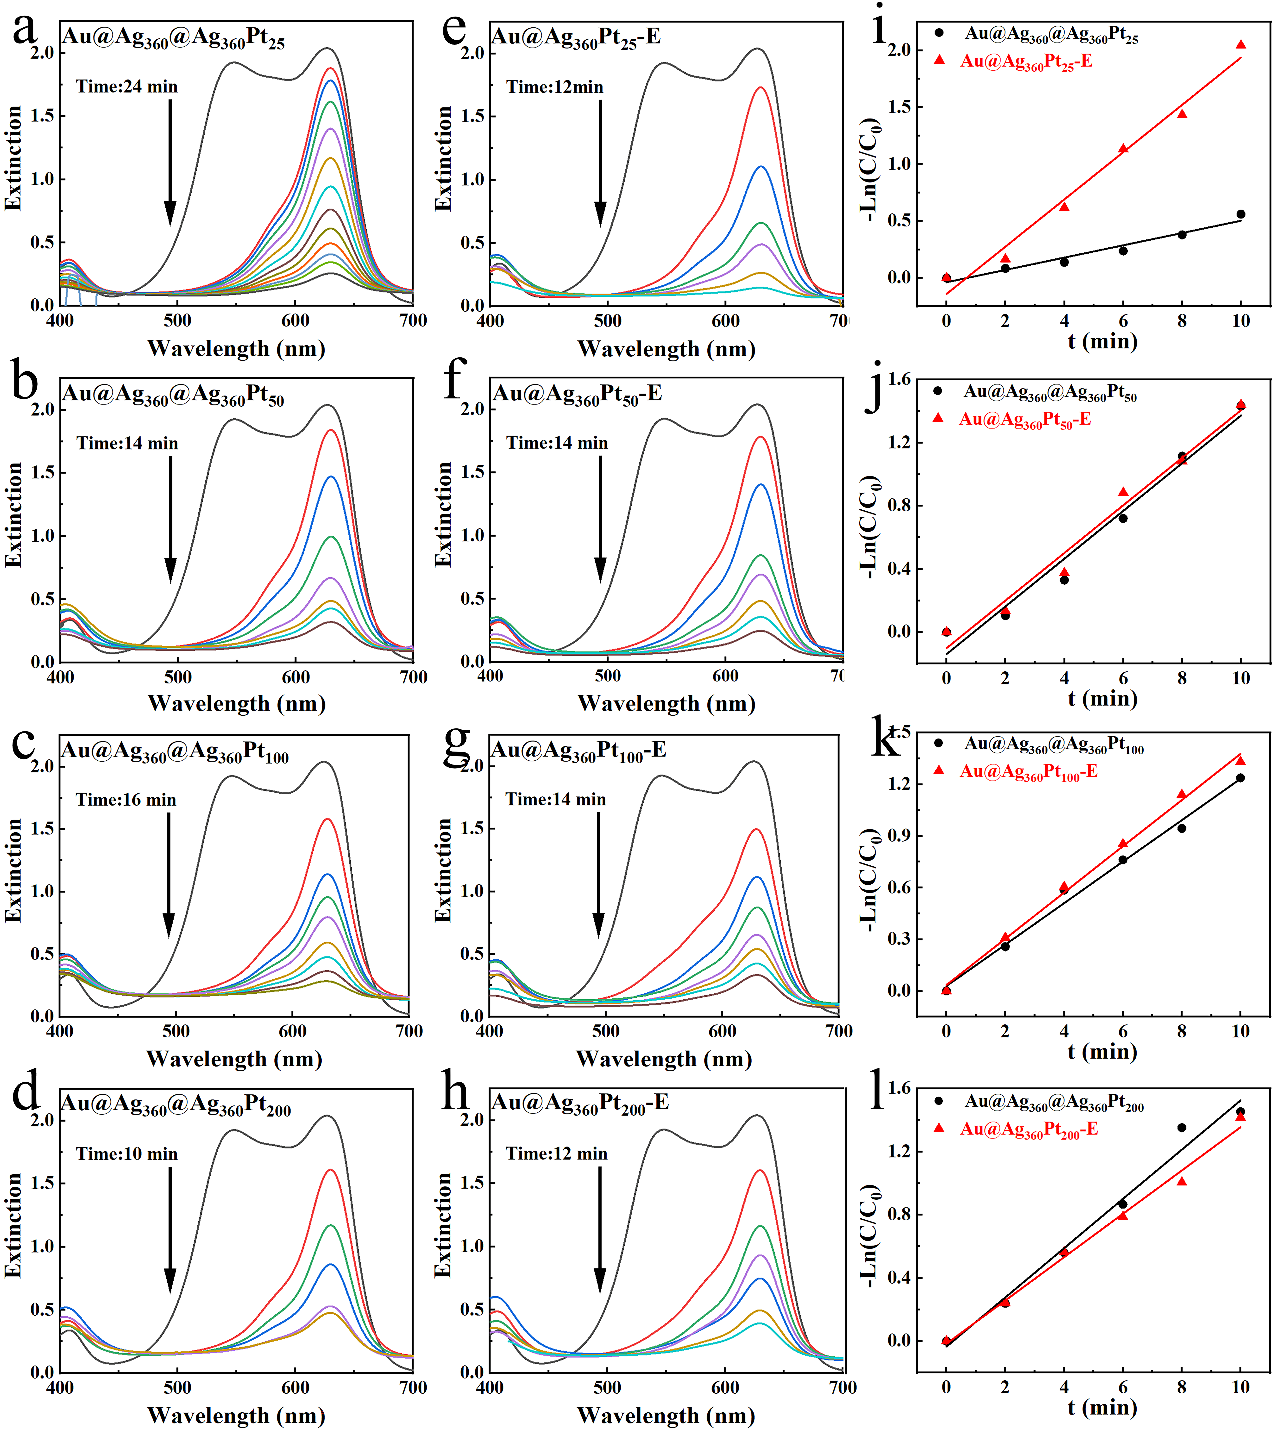
**Figure S11** The spectrum of Methylene Blue (MB) during the photocatalytic process of (a) Au@Ag360@Ag360Pt25, (b) Au@Ag360@Ag360Pt50, (c) Au@Ag360@Ag360Pt100, (d) Au@Ag360@Ag360Pt200, (e) Au@Ag360Pt25-E, (f) Au@Ag360Pt50-E, (g) Au@Ag360Pt100-E, (h) Au@Ag360Pt200-E. (i) – (l) The photocatalytic rate graphs of the corresponding materials before and after etching.


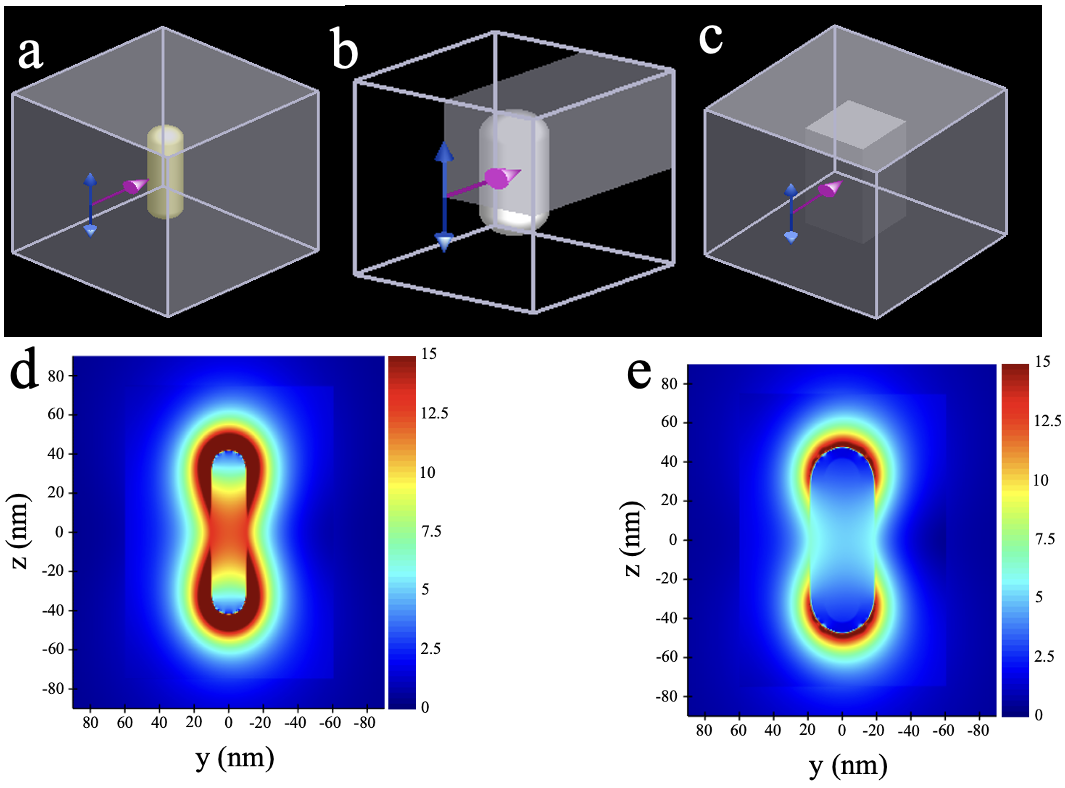


**Figure S12** Model diagrams and the FDTD electric field diagrams. (a), (b), and (c) are model diagrams of Au NRs, Au@Ag360, and Au@Ag360@A360P25, respectively. (d) and (e) are the FDTD electric field diagrams of Au NRs and Au@Ag360, respectively.

**Table S1** The length and diameter of Au NRs, Au@Pt25, Au@Ag360, Au@Ag360@A360P25, and Au@A360P25-E.

| **Material** | **Length** | **Diameter** |
| --- | --- | --- |
| **Au NRs** | **84.4 ± 8.7** | **20.4 ± 2.6** |
| **Au@Pt25** | **90.0 ± 8.9** | **26.6 ± 2.4** |
| **Au@Ag360** | **95.2 ± 6.0** | **33.6 ± 3.6** |
| **Au@Ag360@Ag360Pt25** | **97.2 ± 8.2** | **38.3 ± 5.6** |
| **Au@Ag360Pt25-E** | **96.5 ± 6.4** | **37.4 ± 4.8** |

**Table S2** The length and diameter of Au@Ag45@Ag45Pt25, Au@Ag90@Ag90Pt25, Au@Ag180@Ag180Pt25, Au@Ag90@Ag90Pt50, Au@Ag90@Ag90Pt100, Au@Ag90@Ag90Pt200.

| **Material** | **Length** | **Diameter** |
| --- | --- | --- |
| **Au@Ag45@Ag45Pt25** | **91.6 ± 7.3** | **27.4± 5.2** |
| **Au@Ag90@Ag90Pt25** | **93.0 ± 9.2** | **29.4± 4.5** |
| **Au@Ag180@Ag180Pt25** | **94.3 ± 7.4** | **33.5± 3.7** |
| **Au@Ag90@Ag90Pt50** | **93.4 ± 9.2** | **29.4± 7.3** |
| **Au@Ag90@Ag90Pt100** | **94.1 ± 10.6** | **33.8± 9.2** |
| **Au@Ag90@Ag90Pt200** | **103.5 ± 12.4** | **40.5± 8.3** |

**Table S3** Multiples of the catalytic rates of different etched materials relative to Au NRs.

| **etched** | **Ag 45 μM** | **Ag 90 μM** | **Ag 180 μM** | **Ag 360 μM** |
| --- | --- | --- | --- | --- |
| **Pt 25 μM** | **3.67** | **5** | **7.67** | **7** |
| **Pt 50 μM** | **7.6** | **6** | **7** | **5** |
| **Pt 100 μM** | **5.67** | **5** | **4.67** | **4.33** |
| **Pt 200 μM** | **7** | **7.33** | **4** | **5.33** |

**Table S4** Multiples of the catalytic rates of different non-etched materials relative to Au NRs.

| **non-etched** | **Ag 0 μM** | **Ag 45 μM** | **Ag 90 μM** | **Ag 180 μM** | **Ag 360 μM** |
| --- | --- | --- | --- | --- | --- |
| **Pt 0 μM** | **1** | **1.67** | **2.33** | **1** | **0.67** |
| **Pt 25 μM** | **1** | **3.33** | **3.67** | **4.67** | **1.67** |
| **Pt 50 μM** | **4** | **4.67** | **2.67** | **5.33** | **5** |
| **Pt 100 μM** | **2.33** | **5** | **3.3** | **3.67** | **4** |
| **Pt 200 μM** | **1.33** | **4.33** | **7.67** | **3.33** | **4.67** |

**Table S5** Multiples of the catalytic rates of non-etched materials relative to etched materials.

| **Multiple** | **Ag 45 μM** | **Ag 90 μM** | **Ag 180 μM** | **Ag 360 μM** |
| --- | --- | --- | --- | --- |
| **Pt 25 μM** | **1.10** | **1.36** | **1.64** | **4.19** | |
| **Pt 50 μM** | **1.64** | **2.24** | **1.31** | **1** | |
| **Pt 100 μM** | **1.12** | **1.50** | **1.27** | **1.08** | |
| **Pt 200 μM** | **1.62** | **0.96** | **1.20** | **1.14** | |
